# Supplementary material for: A scalable model for simulating multi-round antibody evolution and benchmarking of clonal tree reconstruction methods
Source: Frontiers journal article supplement (doi:10.3389/fimmu.2022.1014439), 2022-12-06
Supplement: Data_Sheet_1.PDF [file Data_Sheet_1.PDF]

# Supplementary Material

## 1 BRIEF INTRODUCTION OF RELEVANT CONCEPTS

### **Antibodies.**

Antibodies are produced by *B cells* and are used by the immune system to recognize, bind, and neutralize pathogens. Antibodies are proteins consisting of immunoglobulin (IG) molecules of identical heavy chains and identical light chains. Immunoglobulins are encoded by B-cell receptor (BCR) sequences. Unlike other proteins, IGs are not encoded in the genome directly but present results of somatic *V(D)J recombination* of *IG loci* (Kurosawa and Tonegawa, 1982). Each chain of each IG is encoded by a concatenation of one of V, D (only for heavy chain), and J genes, known as an *IG gene*. An IG gene contains three *complementarity-determining regions* (CDRs) representing antigen binding sites. CDRs are separated by four *framework regions* (FRs) that form a stable structure displaying CDRs on the antibody surface.

### **AM process.**

After successful binding of an IG to a given pathogen, the corresponding B cell undergoes the *affinity maturation* (AM) process aiming to improve its *affinity* (i.e., binding ability) to the antibody (Tonegawa, 1983; Neuberger and Milstein, 1995). First, the targeting B cell moves to a *germinal center* (GC) of a lymph node, where it undergoes *clonal expansion*: cell divisions that increase the pool of antibodies that bind to the antigen. Then, certain enzymes in the B cell and its clones are activated and introduce *somatic hypermutations* (SHMs) in the utilized IG genes as a means to improve affinity (Muramatsu et al., 2000). SHMs change the three-dimensional structure of an antibody (and thus its ability to bind to an antigen) stochastically. The regulatory mechanisms of the immune system play the role of natural selection by expanding B cells with high affinity for antigen and killing self-reactive B cells with potentially harmful mutations. The AM process activates naive B cells (i.e., those that have not been exposed to an antigen) and differentiates them into *memory* and *plasma* B cells. Memory B cells can be repeatedly activated and subjected to the AM Mesin et al. (2020), while plasma B cells can secrete massive levels of neutralizing antibodies. Studies show that CDRs, which include the binding sites, accumulate more SHMs compared to FRs (Hsiao et al., 2019; Safonova and Pevzner, 2019).

### **Clonal expansion.**

The AM process leads to the formation of clonal lineages within a given antibody repertoire, where each clonal lineage is formed by descendants of a single naive B cell. The expressed IG transcripts within the same clonal lineage share a common combination of V, D, and J genes and differ by SHMs only. The evolutionary history of each clonal lineage can be represented by a *clonal tree*, where each vertex corresponds to a B cell and each B cell is connected by a directed edge with all its immediate descendants.

## 2 SUPPLEMENTARY METHODS

### 2.1 Efficient sampling from the BDT model

Recall that because of the memoryless property, the time until the next BDT event always follows the exponential distribution with rates  $\Lambda_B(\mathbf{x}_i, \mathbf{S})$ ,  $\Lambda_D(\mathbf{x}_i, \mathbf{S})$ , and  $\Lambda_T(\mathbf{x}_i, \mathbf{S})$  for each event type. The time until *any* event for *any* entity follows an exponential distribution with rate

$$\lambda = \sum_{i \in S} (\Lambda_B(\mathbf{x}_i, \mathbf{S}) + \Lambda_D(\mathbf{x}_i, \mathbf{S}) + \Lambda_T(\mathbf{x}_i, \mathbf{S})) .$$

The probability of the next event being a specific event  $E \in \{B, D, T\}$  for a particular entity  $i$  is

$$\frac{\Lambda_E(\mathbf{x}_i, \mathbf{S})}{\lambda} .$$

We **assume** that we are able to write

$$\Lambda_E(\mathbf{x}_i, \mathbf{S}) = \frac{P_E(\mathbf{x}_i, \mathbf{S})}{Q(\mathbf{S})}$$

where  $P_E : \mathbb{R}_{\geq 0}^N \times \mathbb{R}_{\geq 0}^N \rightarrow \mathbb{R}_{\geq 0}$  and  $Q : \mathbb{R}_{\geq 0}^N \rightarrow \mathbb{R}_{> 0}$  are polynomial functions with a constant degree, where coefficients of  $P_E$  are non-negative. With this assumption, for any entity  $i \in S$ , the birth rate can be written as

$$\Lambda_B(\mathbf{x}_i, \mathbf{S}) = \frac{\sum_{\alpha, \beta \in \Gamma} \mathcal{B}_{\alpha, \beta} \mathbf{S}^\beta \mathbf{x}_i^\alpha}{\sum_{\beta \in \Gamma} Q_\beta \mathbf{S}^\beta}$$

where  $\Gamma = [0 \dots \gamma]^N$  for some integer  $\gamma$ ,  $\mathcal{B}_{\alpha, \beta}$  and  $Q_\beta$  are coefficients of the polynomials, and  $\mathbf{a}^\mathbf{b}$  denotes  $\prod_i \mathbf{a}_i^{\mathbf{b}_i}$  for vectors  $\mathbf{a}$  and  $\mathbf{b}$ . We can write  $\Lambda_D(\mathbf{x}_i, \mathbf{S})$  and  $\Lambda_T(\mathbf{x}_i, \mathbf{S})$  similarly by replacing  $\mathcal{B}_{\alpha, \beta}$  with  $\mathcal{D}_{\alpha, \beta}$  and  $\mathcal{T}_{\alpha, \beta}$ . Note that in our specific AM model, rates shown in Table S1 follow this assumption.

With this assumption, we can write

$$\lambda = \frac{\sum_{\alpha, \beta \in \Gamma} P_{\alpha, \beta} \mathbf{S}^\beta \theta_\alpha}{\sum_{\beta \in \Gamma} Q_\beta \mathbf{S}^\beta}$$

where  $P_{\alpha, \beta} = \mathcal{B}_{\alpha, \beta} + \mathcal{D}_{\alpha, \beta} + \mathcal{T}_{\alpha, \beta}$  and  $\theta_\alpha = \sum_{i \in S} \mathbf{x}_i^\alpha$  for all  $\alpha$  values (note that  $\mathbf{S} = \theta_1$ ). Thus, to efficiently sample the time till the next event, we only need  $\theta_\alpha$  values which we can simply store and update in constant time after each event. This fast storing and updating allows for a constant

**Table S1.** Birth, death, and transformation rate functions as polynomials.

| Rate functions                        | Infected stage                                                                                                                | Dormant stage                               |
|---------------------------------------|-------------------------------------------------------------------------------------------------------------------------------|---------------------------------------------|
| $\Lambda_B(\mathbf{x}_i, \mathbf{S})$ | $\lambda_b g_i$                                                                                                               | 0                                           |
| $\Lambda_D(\mathbf{x}_i, \mathbf{S})$ | $\frac{\lambda_b(1-\rho_p-\rho_m)}{C} \left(\frac{g_i}{a_i}\right) \sigma + (\rho_p \lambda_b - \lambda'_d) g_i + \lambda'_d$ | $(\lambda_d - \lambda'_d) g_i + \lambda'_d$ |
| $\Lambda_T(\mathbf{x}_i, \mathbf{S})$ | $t_i$                                                                                                                         | 0                                           |

time sampling of the next event time (in terms of  $n$ ) for constants  $N$  and  $\gamma$ . Once we sample the time till the next event, we need to sample one of the three possible events. The probability of the next event being birth for an entity  $i$  is

$$\begin{aligned} \frac{\Lambda_B(\mathbf{x}_i, \mathbf{S})}{\lambda} &= \frac{\Lambda_B(\mathbf{x}_i, \mathbf{S})}{\sum_{j \in S} (\Lambda_B(\mathbf{x}_j, \mathbf{S}) + \Lambda_D(\mathbf{x}_j, \mathbf{S}) + \Lambda_T(\mathbf{x}_j, \mathbf{S}))} \\ &= \frac{\sum_{\alpha, \beta \in \Gamma} \mathcal{B}_{\alpha, \beta} \mathbf{S}^\beta \mathbf{x}_i^\alpha}{\sum_{\alpha, \beta \in \Gamma} P_{\alpha, \beta} \mathbf{S}^\beta \theta_\alpha} = \sum_{\alpha, \beta \in \Gamma} \left( \mathcal{B}_{\alpha, \beta} \mathbf{S}^\beta \mathbf{x}_i^\alpha \frac{1}{\sum_{\bar{\alpha}, \bar{\beta} \in \Gamma} P_{\bar{\alpha}, \bar{\beta}} \mathbf{S}^{\bar{\beta}} \theta_{\bar{\alpha}}} \right) \\ &= \sum_{\alpha, \beta \in \Gamma} \left( \left( \frac{\mathcal{B}_{\alpha, \beta} \mathbf{S}^\beta \mathbf{x}_i^\alpha}{P_{\alpha, \beta} \mathbf{S}^\beta \theta_\alpha} \right) \left( \frac{P_{\alpha, \beta} \mathbf{S}^\beta \theta_\alpha}{\sum_{\bar{\alpha}, \bar{\beta} \in \Gamma} P_{\bar{\alpha}, \bar{\beta}} \mathbf{S}^{\bar{\beta}} \theta_{\bar{\alpha}}} \right) \right) \\ &= \sum_{\alpha, \beta \in \Gamma} \left( \left( \frac{\mathcal{B}_{\alpha, \beta}}{P_{\alpha, \beta}} \right) \left( \frac{\mathbf{x}_i^\alpha}{\theta_\alpha} \right) \left( \frac{P_{\alpha, \beta} \mathbf{S}^\beta \theta_\alpha}{\sum_{\bar{\alpha}, \bar{\beta} \in \Gamma} P_{\bar{\alpha}, \bar{\beta}} \mathbf{S}^{\bar{\beta}} \theta_{\bar{\alpha}}} \right) \right). \end{aligned} \quad (\text{S1})$$

Also note that probability of each death and transformation event can be written similarly. This equation enables an efficient sampling procedure detailed in Algorithm S1 of Appendix 4:

1. Sample  $(\alpha, \beta)$  pair (representing one term of the polynomial) from a multinomial distribution on  $\Gamma \times \Gamma$  where each pair has probability  $\frac{P_{\alpha, \beta} \mathbf{S}^\beta \theta_\alpha}{\sum_{\bar{\alpha}, \bar{\beta} \in \Gamma} P_{\bar{\alpha}, \bar{\beta}} \mathbf{S}^{\bar{\beta}} \theta_{\bar{\alpha}}}$ .
2. Sample entity  $i$  from a distribution on  $S$  where each  $i$  has probability  $\mathbf{x}_i^\alpha / \theta_\alpha$ .
3. Sample birth, death, or transformation with probabilities  $\frac{\mathcal{B}_{\alpha, \beta}}{P_{\alpha, \beta}}$ ,  $\frac{\mathcal{D}_{\alpha, \beta}}{P_{\alpha, \beta}}$ , and  $\frac{\mathcal{T}_{\alpha, \beta}}{P_{\alpha, \beta}}$ .

In this procedure, the probability of selecting the birth event for an entity  $i$  is simply  $\sum_{\alpha, \beta} \frac{\mathcal{B}_{\alpha, \beta}}{P_{\alpha, \beta}} \frac{\mathbf{x}_i^\alpha}{\theta_\alpha} \frac{P_{\alpha, \beta} \mathbf{S}^\beta \theta_\alpha}{\sum_{\bar{\alpha}, \bar{\beta} \in \Gamma} P_{\bar{\alpha}, \bar{\beta}} \mathbf{S}^{\bar{\beta}} \theta_{\bar{\alpha}}}$ , which matches Equation (S1) (ditto for death and transformation events). In terms of running time:

1. Step 1 takes constant time (in terms of  $n$ ) given that  $\theta_\alpha$  values (and thus  $\mathbf{S}$ ) are pre-computed for all  $\alpha$ .
2. Step 2 can be achieved in  $O(\log n)$  time using an interval tree data structure to store partial sums of  $\mathbf{x}_j^\alpha$ 's (see Algorithm S1).
3. Step 3 takes constant time.

Thus, a tree on  $k$  nodes drawn from the distribution defined by the BDT process can be sampled in  $O(k \log(k))$  time by repeated applications of Algorithm S1.

## 2.2 Somatic hypermutagenesis frequency models

We next show the model for  $K^5$  and  $f$ . Our model is based on an empirical frequency  $K^5(s, s_1, s_2, s_3, s_4, s_5)$  matrix that counts the number of times 5-mer  $(s_1, s_2, s_3, s_4, s_5)$  converts to  $(s_1, s_2, s, s_4, s_5)$  in one cycle of cell division during hypermutation. Given the matrix, we define

$$f(s, s_1, s_2, s_3, s_4, s_5) = \begin{cases} K^5(s, s_1, s_2, s_3, s_4, s_5) \frac{\mu}{\text{RateEmp}} & s \neq s_3 \\ 1 - \sum_{s' \in \{A, C, G, T\} - \{s\}} K^5(s', s_1, s_2, s_3, s_4, s_5) & s = s_3 \end{cases} \quad (\text{S2})$$

where

$$\text{RateEmp} = 1 - \frac{\sum_{s_1, s_2, s_3, s_4, s_5 \in \{A, C, G, T\}} K^5(s_3, s_1, s_2, s_3, s_4, s_5)}{\sum_{s, s_1, s_2, s_3, s_4, s_5 \in \{A, C, G, T\}} K^5(s, s_1, s_2, s_3, s_4, s_5)}. \quad (\text{S3})$$

Somatic hypermutagenesis of antibodies is the result of activation-induced deaminase (AID) enzyme activity that changes a random C:G base into a U:G base in B cell DNA. U:G mismatch can be repaired using UDG (uracil-DNA glycosylase) or MMR (DNA mismatch repair) machinery that forms diversity of hypermutations (Peled et al., 2008). Certain biological mechanisms of SHM occurrences were studied extensively. For example, Rogozin and Kolchanov (1992) observed specific hot/cold-spot DNA motifs for SHMs in immunoglobulin genes. Particularly, WRCY/RGYW where  $W = \{A, T\}$ ,  $Y = \{C, T\}$ ,  $R = \{G, A\}$  and later predicted more general WRCH/DGYW with  $H = \{A, C, T\}$  and  $D = \{A, G, T\}$  motifs are hot-spots for SHMs caused by weak hydrogen-bonds (Rogozin and Diaz, 2004). SYC/GRS ( $S = C, G$ ) is a cold-spot motif caused by strong hydrogen-bonds (Bransteitter et al., 2004). The locality of AID enzyme activity has been emphasized. (Smith et al., 1996; Shapiro et al., 2003).

To simulate SHM, we modified a model proposed by Yaari et al. (2013). The model extends the notion of hot/cold-spots and suggests that a certain hierarchy of mutabilities exists following Smith et al. (1996) and Shapiro et al. (2003). The model is based on the mutability of a central base in each 5-mer of an antibody heavy chain and consists of two parts: a targeting model identifying if a mutation occurs in the variable part of an antibody and a substitution model providing an insight into what is this mutation. In order to avoid selection bias, the authors considered 5-mers where only synonymous substitutions of the central base are possible and inferred probabilities for other 5-mers. Unfortunately, synonymous substitutions constitute only a fraction of possible mutations. To overcome this issue, Yaari et al. (2013) proposed a special inference method to estimate parameters for the rest of 5-mers. Parameters for targeting and substitution models were inferred for 468 and 740 5-mers, respectively. However, the accuracy of this procedure was shown to be suboptimal (Yaari et al., 2013, Table 2). Additionally, some of the datasets that were used to estimate the parameters are derived from an error-prone 454 sequencing technology.

We re-estimated the parameters of this model and considered all 5-mers without limiting our scope to synonymous mutations. We also utilized three up-to-date repertoire sequencing datasets (all data were produced using the Illumina MiSeq platform):

- PRJNA349143. Time series of three individuals during influenza vaccination, both before and after vaccination.

- PRJNA395083. Bulk unsorted PBMC from peripheral blood of several healthy donors.
- A dataset of paired end sequences, added to increase power.

While the last dataset we used is not publicly available, we make the resulting k-mer model available publicly at <https://github.com/chaoszhang/immunosimulator/blob/master/kmerFreq.txt>.

From each dataset, we obtained a matrix of the size  $1024 \times 4$ , where each row corresponds to a distinct 5-mer and contains # *non-mutated occurrences* of this 5-mer and three possible # *nucleotide substitution occurrences*. To calculate this matrix for a given dataset, we found the closest V gene for every read and record the number of observed 5-mers in the gene and their corresponding mutated copies across the read. For any 5-mer  $K$ , the corresponding row of a constructed matrix can be viewed simultaneously as a value of *Binomial* and *Multinomial* distributions. *Binomial* distribution represents the number of occurred mutations among all occurrences of the 5-mer  $K$ , while *Multinomial* distribution indicates the number of mutations to specific bases among all occurred mutations. The parameters of these distributions indicate the mutability and substitution profiles for each 5-mer  $K$ . The 5-mer frequencies were combined across all these datasets to obtain the final matrix, available at <https://github.com/chaoszhang/immunosimulator/blob/master/kmerFreq.txt>.

### 2.3 Default parameters

Here we provide the actual default values used for several parameters that did not fit in Table 1 of the main paper.

### 2.3.1 BLOSUM.

The BLOSUM matrix table (Table S2) is obtained from <ftp://ftp.ncbi.nih.gov/blast/matrices/BLOSUM100>.

Table S2. BLOSUM table

|   | A  | R  | N  | D   | C  | Q  | E  | G  | H  | I  | L  | K  | M  | F  | P  | S  | T  | W   | Y  | V  |
|---|----|----|----|-----|----|----|----|----|----|----|----|----|----|----|----|----|----|-----|----|----|
| A | 8  | -3 | -4 | -5  | -2 | -2 | -3 | -1 | -4 | -4 | -4 | -2 | -3 | -5 | -2 | 1  | -1 | -6  | -5 | -2 |
| R | -3 | 10 | -2 | -5  | -8 | 0  | -2 | -6 | -1 | -7 | -6 | 3  | -4 | -6 | -5 | -3 | -3 | -7  | -5 | -6 |
| N | -4 | -2 | 11 | 1   | -5 | -1 | -2 | -2 | 0  | -7 | -7 | -1 | -5 | -7 | -5 | 0  | -1 | -8  | -5 | -7 |
| D | -5 | -5 | 1  | 10  | -8 | -2 | 2  | -4 | -3 | -8 | -8 | -3 | -8 | -8 | -5 | -2 | -4 | -10 | -7 | -8 |
| C | -2 | -8 | -5 | -8  | 14 | -7 | -9 | -7 | -8 | -3 | -5 | -8 | -4 | -4 | -8 | -3 | -3 | -7  | -6 | -3 |
| Q | -2 | 0  | -1 | -2  | -7 | 11 | 2  | -5 | 1  | -6 | -5 | 2  | -2 | -6 | -4 | -2 | -3 | -5  | -4 | -5 |
| E | -3 | -2 | -2 | 2   | -9 | 2  | 10 | -6 | -2 | -7 | -7 | 0  | -5 | -8 | -4 | -2 | -3 | -8  | -7 | -5 |
| G | -1 | -6 | -2 | -4  | -7 | -5 | -6 | 9  | -6 | -9 | -8 | -5 | -7 | -8 | -6 | -2 | -5 | -7  | -8 | -8 |
| H | -4 | -1 | 0  | -3  | -8 | 1  | -2 | -6 | 13 | -7 | -6 | -3 | -5 | -4 | -5 | -3 | -4 | -5  | 1  | -7 |
| I | -4 | -7 | -7 | -8  | -3 | -6 | -7 | -9 | -7 | 8  | 2  | -6 | 1  | -2 | -7 | -5 | -3 | -6  | -4 | 4  |
| L | -4 | -6 | -7 | -8  | -5 | -5 | -7 | -8 | -6 | 2  | 8  | -6 | 3  | 0  | -7 | -6 | -4 | -5  | -4 | 0  |
| K | -2 | 3  | -1 | -3  | -8 | 2  | 0  | -5 | -3 | -6 | -6 | 10 | -4 | -6 | -3 | -2 | -3 | -8  | -5 | -5 |
| M | -3 | -4 | -5 | -8  | -4 | -2 | -5 | -7 | -5 | 1  | 3  | -4 | 12 | -1 | -5 | -4 | -2 | -4  | -5 | 0  |
| F | -5 | -6 | -7 | -8  | -4 | -6 | -8 | -8 | -4 | -2 | 0  | -6 | -1 | 11 | -7 | -5 | -5 | 0   | 4  | -3 |
| P | -2 | -5 | -5 | -5  | -8 | -4 | -4 | -6 | -5 | -7 | -7 | -3 | -5 | -7 | 12 | -3 | -4 | -8  | -7 | -6 |
| S | 1  | -3 | 0  | -2  | -3 | -2 | -2 | -2 | -3 | -5 | -6 | -2 | -4 | -5 | -3 | 9  | 2  | -7  | -5 | -4 |
| T | -1 | -3 | -1 | -4  | -3 | -3 | -3 | -5 | -4 | -3 | -4 | -3 | -2 | -5 | -4 | 2  | 9  | -7  | -5 | -1 |
| W | -6 | -7 | -8 | -10 | -7 | -5 | -8 | -7 | -5 | -6 | -5 | -8 | -4 | 0  | -8 | -7 | -7 | 17  | 2  | -5 |
| Y | -5 | -5 | -5 | -7  | -6 | -4 | -7 | -8 | 1  | -4 | -4 | -5 | -5 | 4  | -7 | -5 | -5 | 2   | 12 | -5 |
| V | -2 | -6 | -7 | -8  | -3 | -5 | -5 | -8 | -7 | 4  | 0  | -5 | 0  | -3 | -6 | -4 | -1 | -5  | -5 | 8  |

### 2.3.2 Starting and target sequences.

#### 2.3.2.1 SARS-CoV2

The starting sequence  $\hat{\Psi}$  is set to:

CAAATGCAGCTGGTGCAGTCTGGGCCTGAGGTGAAGAAGCCTGGGACCTCAGTGAAGGTCTCCT  
GCAAGGCTTCTGGATTACCTTTACTAGCTCTGCTGTGCAGTGGGTGCGACAGGCTCGTGGACAA  
CGCCTTGAGTGGATAGGATGGATCGTCGTTGGCAGTGGTAACACAAACTACGCACAGAAGTTCCA  
GGAAAGAGTCACCATTACCAGGGACATGTCCACAAGCACAGCCTACATGGAGCTGAGCAGCCTGA  
GATCCGAGGACACGGCCGTGTATTACTGTGCGGCACCGCACTGCAGCGGCGGCAGCTGCCTCGAT  
GCTTTTGATATCTGGGGCCAAGGGACAATGGTCACCGTCTCTTCA

and thus  $\zeta_0$  is

QVQLVQSGPEVKKPGTSVKVSKASGFTFTSSAVQWVRQARGQRLEWIGWIVVSGSNTNYAQKF  
QERVITITRDMSTSTAYMELSSLRSED TAVYYCAAPHCSGGSCLD AFDIWGQGTMTVSS.

In each replicate simulation  $\zeta_i$  and  $t_i$  are randomly chosen from Table S3.

**Table S3.** Names of antibodies in CoV-AbDab, heavy chain sequences (targets), and starting days of infection

| <b>Name</b>   | <b>Target Sequence</b>                                                                                                                  | <b>Day</b> |
|---------------|-----------------------------------------------------------------------------------------------------------------------------------------|------------|
| C005          | QVQLVQSGPEVKKPGTSVKVSKASGFTFTSSAVQWVRQAR<br>GQRLEWIGWIVVGSGNTNYAQKFQERVITITRDMSTSTAYME<br>LSSLRSED TAVYYCAAPHCSGGSCLD AFDI WGQGTMTVTVSS | 0          |
| COV2-2072     | QMQLVQSGPEVKKPGTSVKVSKTS GFTFTSSAIQWVRQAR<br>GQRLEWIGWIVVGSGNTNYAQKFQERVITITRDMSTSTAYME<br>LSSLRSED TAVYYCAAPHCNRTSCYDAFDLWGQGTMTVTVSS  | 41         |
| Ab_58G6       | QMQLVQSGPEVKKPGTSVKVSKASGFTFSSSAVQWVRQAR<br>GQHLEWIGWIVVGSGNTNYAQKFQERVTLTRDMSTR TAYME<br>LSSLRSED TAVYYCAAPNCNSTTCHDGF DIWGQGTMTVTVSS  | 98         |
| S2-E12        | QVQLVQSGPEVKKPGTSVRVSKASGFTFTSSAVQWVRQAR<br>GQRLEWVGWIVVGSGNTNYAQKFHERVTITRDMSTSTAYME<br>LSSLRSED TAVYYCASPYCSGGSCSDGF DIWGQGTMTVTVSS   | 163        |
| B1-182-1      | QMQLVQSGPEVKKPGTSVKVSKASGFTFTSSAVQWVRQAR<br>GQRLEWIGWIVVGSGNTNYAQKFQERVITITRDMSTSTAYME<br>LSSLRSED TAVYYCAAPYCSGGSCFDGF DIWGQGTMTVTVSS  | 272        |
| COVOX-253H55L | QVQLVQSGPEVKKPGTSVKVSKASGFTFTTSSAVQWVRQAR<br>GQRLEWIGWIVVGSGNTNYAQKFQERVITITRDMSTTTAYME<br>LSSLRSED TAVYFCAAPHCNSTSCYDAFDI WGQGTMTVTVSS | 283        |
| C597          | QVQLVQSGPEVKKPGTSVKVSKASGFTFTNSAVQWVRQSR<br>RQRLEWIGWIVVGSGNTNYAQKFQERVITITRDMSTSTAYME<br>LSSLRSED TAVYYCAAVDCNSTSCYDAFDI WGQGTMTVTVSS  | 430        |
| AZD-8895      | QMQLVQSGPEVKKPGTSVKVSKASGFTFMSSAVQWVRQAR<br>GQRLEWIGWIVIGSGNTNYAQKFQERVITITRDMSTSTAYME<br>LSSLRSED TAVYYCAAPYCSSISCNDGF DIWGQGTMTVTVSS  | 458        |
| CS102         | QVQLVQSGPEVKKPGTSVKVSKASGFTFPSSAVQWVRQAR<br>GQRLEWIGWIVVGSGNTNYAQKFQERVITITRDMSTSTAYME<br>LSSLRSED TAVYYCAAPHCGGGSCYDGF DIWGQGTMTVTVSS  | 504        |
| Beta-47       | QVQLVESGPEMKKPGTSVKVSKASGFTFITS AVQWVRQAR<br>GQRLEWMGWIAVGSGNTNYAQKFQDRVITINRDMSTSTAYME<br>LSSLRSED TAVYYCAAPHCNRTSCHDGF DIWGQGTMTVTVSS | 575        |
| CZ-D7         | QMQLVQSGPEVKKPGTSVKVSKASGFTFTNSAMQWVRQAR<br>GQRLEWVGWIVVASGNANSARRFHDRVITITSDMSTSTAYLE<br>LSSLRSED TAVYYCALNHCSNTTCLDGF DIWGQGTMTVSVSS  | 609        |
| R259-1B9      | QMHLVQSGPEVKKPGTSVKVSKASGFTFSSSAVQWVRQAR<br>GQHLEWIGWIVVGSGNTNYGQKFQERVITITRDLSTSTVYME<br>LISLRSED TAVYFCAAPYCTGGSCFD AFDI WGQGTMTVTVSS | 641        |
| Omi-12        | EVQLVESGPEVKKPGTSVKVSKASGFSFSMSAMQWVRRAR<br>GQRLEWIGWIVPGSGNANYAQKFQERVITITRDESTNTGYME<br>LSSLRSED TAVYYCAAPHCNKTNCYDAFDI WGQGTMTVTVSS  | 743        |
| BD57-049      | QMQLVQSGPEVKKPGTSAKVACQASGFTFYSSAIQWVRQAR<br>GQRLEWIGWIVVGSGNTNYAEEFQERVITITRDMSTSTAYME<br>LSSLRSGDTAVYYCAAPHCNRTSCYDGF DIWGQGTMTVTVSS  | 785        |

### 2.3.2.2 Influenza

The starting sequence  $\hat{\Psi}$  is set to:

```
CAGGTGCAGCTGCAGGAGTCGGGCCCAGGACTGGTGAAGCCTTCACAGACCCTGTCCCTCACCT
GCACTGTCTCTGGTGGCTCCATCAGCAGTGGTGGTTACTACTGGAGCTGGATCCGCCAGCACCCA
GGGAAGGGCCTGGAGTGGATTGGGTACATCTATTACAGTGGGAGCACCTACTACAACCCGTCCCT
CAAGAGTCGAGTTACCATATCAGTAGACACGTCTAAGAACCAGTTCTCCCTGAAGCTGAGCTCTG
TGACTGCCGCGGACACGGCCGTGTATTACTGTGCGAGAGCGCGCGTCAATAGGGATATTGCGTAC
GGCAACTGGTTCGACCCCTGGGGCCAGGGGACCCTGGTCACCGTCTCCTCA
```

and thus  $\zeta_0$  is

```
QVQLQESGPGLVKPSQTLSTCTVSGGSISSGGYYWSWIRQHPGKGLEWIGYIYYSGSTYYNPS
LKSRVTISVDTSKNQFSLKLSSVTAADTAVYYCARARVNARDIAYGNWFDPWGQGTTLTVSS.
```

$\eta_i$ ,  $\zeta_i$ , and  $t_i$  are given in Table [S4](#).



**Table S4.** Flu accession numbers, CDRs of target sequences, and starting days of infection

| <i>i</i> | Accession  | Target CDR1 | Target CDR2      | Target CDR3        | Day  |
|----------|------------|-------------|------------------|--------------------|------|
| 1        | AAK70482.1 | SGGY        | IGYIYSGSTYYNPSL  | ARARVNRDIAYGNWFD   | 0    |
| 2        | AAK70478.1 | CWWVP       | WWCHCGWCNVXXNIXF | ARARVNREXAYGNWFZA  | 182  |
| 3        | ABL76892.1 | WWWXX       | XGYVYSGSDYYDPSL  | VKVKNKEVVYGNWFEA   | 365  |
| 4        | AFP83103.2 | WWWAB       | TBYVYSGSDYYDXSL  | VKVKNKEVVYGNWFEA   | 398  |
| 5        | AFP83094.2 | WWWG        | TGYVYSGSDYYDXSL  | VKVKNKEVVYGNWFEEQ  | 431  |
| 6        | AFP83095.2 | WWCPP       | WWCHCAWXBXXBISL  | ARARVNRELAYGNWFEA  | 464  |
| 7        | AFP83197.2 | WWCPP       | WWCHCZYZVXXBISF  | ARARVNRELAYGNXFEA  | 497  |
| 8        | AFP83098.2 | WWWAX       | AGYVYSGTDYYDBSL  | VKVKNKEVVYGBWFEZ   | 530  |
| 9        | AFP83100.2 | WWWPK       | SXHVVYSGSDYYDXSL | VKVKNKEVVYGNWFEA   | 564  |
| 10       | AAO38870.2 | WWCPP       | WWCHCCWXBVXYBXS  | ARARVNRELAYGNWFZA  | 597  |
| 11       | AFP83199.2 | WWLPP       | WWCHCEWLHVXXXIXY | ARARVNRELAYGNWFZA  | 630  |
| 12       | ABL76881.1 | WLWCG       | KXYVYSGSQFYDASL  | VKVKNKEVVYGNWFZL   | 663  |
| 13       | AFP83097.2 | WCWCG       | CRWVYXXSDYYDIXL  | VKVKNKEVVYGDWFEQ   | 696  |
| 14       | AFP83202.2 | WXYXY       | TGYVYSGSDYYDPSL  | VKVKNKEVVYGNWFEA   | 730  |
| 15       | AFP83201.2 | WWVPP       | WWCNCCWFBTXXXLSF | ARARVNRELAYGNWFEA  | 763  |
| 16       | AFP83118.2 | WYYXD       | TGYVYSGSDYYBPSL  | VKVKNKEVVYGNWFZK   | 796  |
| 17       | AFP83200.2 | WWCPP       | WWCHCCYIBVXXBXS  | ARARVNRELAYGNWFZA  | 829  |
| 18       | AFP83107.2 | WWCPP       | WWCHCCYVBTXXBXS  | ARARVNRELAYGNWYZA  | 862  |
| 19       | AFP83112.2 | WFWDG       | XKWVYSGSDYYDXSL  | VKVKNKEVVYGNWFEEQ  | 895  |
| 20       | AFP83115.2 | WWCPP       | WWCHCCQIBTXXBXS  | ARARVNRELAYGNWFZG  | 929  |
| 21       | AFP83114.2 | WPWGD       | XGYVHYSRSDYYDPSL | VKVKNKEVVYGNWFEP   | 962  |
| 22       | AFP83110.2 | WWCPD       | WWCHCCWIDWXXBXXY | ARARVNRZLAYRNWFEA  | 995  |
| 23       | AFP83105.2 | WYWGN       | GCXLYSGSDYYDPSL  | IKVKIDKELVYGDWZFV  | 1028 |
| 24       | AFP83106.2 | WWCPP       | WWCHCCWVWVNEGLXB | GXXRXXRDLAYGNWYXA  | 1061 |
| 25       | AFP83127.2 | WFWBG       | TGYLYSGSDYYDASL  | IKVKXNKELVYGNWFET  | 1095 |
| 26       | AFP83124.2 | WCWCG       | BGYLYSGSDYYBPSL  | IKVCIBKEMVYGBWFET  | 1216 |
| 27       | AFP83130.2 | WWHPP       | WWCHCCWBCXXXS    | ARARVNRELAYGNWFEA  | 1338 |
| 28       | AFP83134.2 | WBYXY       | TGYVYSGSDYYBPSL  | VKVKNKEVVYGNWFEA   | 1460 |
| 29       | AFP83131.2 | WWHPP       | WWCHCCWRLBXXXS   | ARARVNRZLAYGNWFEA  | 1581 |
| 30       | AFP83135.2 | PPYGD       | PGKVYYSRSDYYDDSL | IKVKXNKYVVYRNWFEEK | 1703 |
| 31       | AFP83150.2 | HPYGD       | PGBVYYSRSDYYDBSL | VKVKNKEVVYRNWFEEK  | 1825 |
| 32       | AFP83206.2 | HPYGD       | PPHCYYSRSDYYDBSL | VKVKNKEVVYRNWFEEZ  | 1946 |
| 33       | AFP83147.2 | HPYGD       | PGHVYYSRSDYYDPSL | IKVKINBXXVYRNWFEEK | 2068 |
| 34       | AFP83154.2 | WXXAY       | PGYVYSGSDYYDPSL  | VKVKNKEVVYGNWFEP   | 2190 |
| 35       | AFP83155.2 | LPYGD       | PGHVYYSRSDYYDDSL | VKVKNKEVVYRNWFEEK  | 2281 |
| 36       | AFP83160.2 | HPYGD       | PGHVYYSRSDYFDDSL | VKVKNKEVVYRNWFEEK  | 2372 |
| 37       | AFP83159.2 | HPYGD       | PGHVYYSRSDYYDDSL | IKVKXNKZVVYRNWFEEK | 2463 |
| 38       | AFP83166.2 | WEHGY       | XGYVYSGSDYYDPSC  | VKVKNKEVVYGNWFEP   | 2555 |
| 39       | AFP83173.2 | WBIMY       | LGFVYSGSDYYBPSL  | VKVKNKEVVYGNWFZA   | 2920 |
| 40       | AFP83163.2 | WPIFY       | LGYVYSGSBYYBPSL  | VKVKNKEVVYGNWFZA   | 3011 |
| 41       | AFP83170.2 | YZIMY       | LGYVYYSASDYYBPSL | VKVKNKEIVYGNWFEA   | 3102 |
| 42       | AFP83174.2 | YIMY        | SGYVYSGSDYYBPSL  | VKVKNKEVVYGBWFEA   | 3193 |
| 43       | AFP83184.2 | ZSZYY       | TDYVYSGIDYYTPSL  | VKVKNKEVVYDYWFEP   | 3285 |
| 44       | AFP83185.2 | BBGY        | TDYVYSGIDYYTPSL  | VKVKNKEVVYDYWFEP   | 3345 |
| 45       | AFP83181.2 | EBAY        | TDYVYSGVDYYEPSL  | VKVKNKEVVYDYWFEP   | 3406 |
| 46       | AFP83208.2 | WDIPY       | LGYVYYSASDYYBPSL | VKVKNKEVVYGNWFZA   | 3467 |
| 47       | AFP83178.2 | FKIMY       | LGYVYSGSDYYDPSL  | VKVKNKEVVYGNWFZA   | 3528 |
| 48       | AFP83177.2 | YEIMW       | LGFVYSGSDYYBPSL  | VKVKNKEVVYGNWFZA   | 3589 |
| 49       | AJK04689.1 | DDGY        | TDYVYSGIDYYEPSL  | VKMKNKEVVYDYWFEP   | 3650 |
| 50       | AJK04818.1 | EBFY        | TDYVYSGVDYYEPSL  | VKVKNKEVVYDYWFEP   | 3832 |
| 51       | AJK04119.1 | ZDPY        | TDYVYSGIDYYBPSL  | VKVKNKEVVYDHWFEP   | 4015 |
| 52       | AFP83190.2 | DDDY        | TDYVYSGIDYYWPSL  | VKVKNKEVVYDYWFEP   | 4075 |
| 53       | AJK05467.1 | DDRY        | TDYVYSGIDYYKPSL  | VKVKNKEVVYDYWFEP   | 4136 |
| 54       | AJK05084.1 | DDGY        | TDYVYSGIDYYVPXL  | VKVKNKEVVYDYWFEP   | 4197 |
| 55       | AJK04964.1 | DDGY        | CDYVYSGIDYYSPSC  | VKVKNKEVVYDYWFEP   | 4258 |
| 56       | AJK05278.1 | EDFY        | TDYVWYTGIDYYXPXL | VKVKNKEVVYDYWFEP   | 4319 |

## 2.4 Evaluation metrics

### 2.4.1 Notations.

For a rooted tree  $T$ , we let  $\mathbf{L}_T$  be the set of leaves and  $\mathbf{I}_T$  be the set of internal nodes. For each node  $v$  of  $T$ , let  $\mathcal{C}(v)$  be the set of its children. We define  $\phi(v)$  as the set of node labels of labeled nodes below  $v$ . Also, for any set of nodes  $V$ , we define  $\phi(V) = \{\phi(v) : \phi(v) \neq \emptyset, v \in V\}$  and  $\phi(T) = \phi(\mathbf{I}_T \cup \mathbf{L}_T)$ . For a set of nodes  $V$  and a set of labels  $\Phi$ ,  $\phi(V) \upharpoonright \Phi = \{\Phi' \cap \Phi : \Phi' \cap \Phi \neq \emptyset, \Phi' \in \phi(V)\}$ . For labeled nodes  $\Psi_i$  and  $\Psi_j$ , let  $U_T(i, j)$  be the number of edges between the node  $\Psi_i$  in  $T$  and the MRCA of  $\Psi_i$  and  $\Psi_j$  in  $T$ .

### 2.4.2 Characterizing a clonal tree

We define a set of metrics for characterizing properties of simulated trees in terms of their topology, branch length, and distribution of labeled nodes (Table S5). Some of these metrics are motivated by similar ones on phylogenetic trees, but are adjusted to allow sampled internal nodes and multifurcations. For example, to measure tree balance, we extend the definition of the number of cherries but allow modifications (our definition reduces to the traditional definition when the tree is binary). Other metrics (e.g., percent internal samples) are only meaningful for clonal trees and are meant to quantify the deviation of a clonal tree from phylogenetic trees.

### 2.4.3 Comparing trees

Many metrics exist for comparing phylogenetic trees. However, in the presence of polytomies and sampled ancestral nodes, the classic metrics need to be amended. Here, we generalize several existing metrics and introduce new ones. All metrics are defined over a simulated tree  $R$  and a reconstructed tree  $E$ , both induced down to include all labeled nodes (i.e., removing unlabeled nodes if less than two of their children have any labeled descendants). See Table S6 for precise definitions of metrics.

#### 2.4.3.1 RF-related.

We refer to the set of labeled nodes under some subtree as a cluster. We define False Discovery Rate (FDR) as the percentage of clusters in  $E$  that are not in  $R$ , False Negative Rate (FNR) as the percentage of clusters in  $R$  that are not in  $E$ , and Robinson-Foulds cluster distance (RF) as the number of clusters in either but not both trees. Note that unlike traditional Robinson and Foulds

Table S5. Properties of a clonal tree  $T$ .

| Property                     | Definition                                                                                                                                                                                                    |
|------------------------------|---------------------------------------------------------------------------------------------------------------------------------------------------------------------------------------------------------------|
| Internal sample (%)          | The percentage of labeled nodes in set $\mathbf{I}_T$ .                                                                                                                                                       |
| Bifurcation index            | Defined as $\frac{ \mathbf{I}_T }{ \mathbf{L}_T -1}$ equals 1 for bifurcating trees and $\approx 0$ for the star tree.                                                                                        |
| Sample depth                 | The average depth of labeled nodes in $T$ .                                                                                                                                                                   |
| Balance (cherry)             | Half the sum over all leaves of the fraction of their siblings that are leaves.<br>$\sum_{v \in \mathbf{I}_T} \frac{( \mathcal{C}(v) \cap \mathbf{L}_T )}{2} / ( \mathcal{C}(v)  - 1)$ where $0/0 \doteq 1/2$ |
| Single mutation branches (%) | The percentage of branches with length one.                                                                                                                                                                   |
| Accumulated mutations (avg)  | The average depth (path length to the root) of all labeled nodes of tree $T$ .                                                                                                                                |
| Accumulated mutations (sum)  | The summation of branch lengths of all branches of tree $T$ .                                                                                                                                                 |
| Mutations per branch         | The average branch length of tree $T$ .                                                                                                                                                                       |

The last four metrics require branch length (in mutation unit) on the tree.

(1981) distance, here, internal nodes can also have labels, and we define the metric based on clusters in a rooted tree instead of bipartitions in an unrooted tree. Moreover, the singleton clusters are trivial when all labeled nodes are leaves; however, when there are labeled internal nodes, including or excluding singletons can make a difference. Thus, we also define FPR FNR, and RF distance when excluding singleton clusters.

### 2.4.3.2 Triplet-based.

We define *triplet discordance* (TD) as the number of trees induced by triples of *labeled* nodes (leaf or internal) where the topology in the simulated tree and the reconstructed tree differ. We define the *triplet edit distance* (TED) as the summation over all triplets of the labeled nodes of cluster RF distance between the two trees induced to the triplet. Intuitively, it is the sum of the minimum number of branch contractions and resolutions required to convert a triplet in  $R$  to a triplet in  $E$ , summed over all triplet.

### 2.4.3.3 Path discordance.

Patristic discordance for a pair of labeled nodes  $\Psi_i$  and  $\Psi_j$  is defined as the difference between the number of branches in the path between  $\Psi_i$  and  $\Psi_j$  on two trees  $R$  and  $E$ . The patristic discordance (PD) between  $R$  and  $E$  is the summation of the Patristic discordance over all pairs of labeled nodes (internal or leaf). We define the MRCA discordance for an ordered pair of labeled nodes  $\Psi_i$  and  $\Psi_j$  as the difference between the number of branches in the path between  $\Psi_i$  and its MRCA with  $\Psi_j$  when computed from trees  $R$  and  $E$ . The MRCA discordance (MD) between the two trees is the summation of MRCA discordance over all ordered pairs of labeled nodes.

The FNR and FDR metrics are already normalized. To normalize other metrics, for each experimental condition, we create a control tree by randomly permuting labels of the true tree. We then normalize scores (other than FNR and FDR) of a reconstruction method by dividing it by the average score of replicates of the control method.

Computing FNR, FDR, and RF metrics takes  $O(\varsigma)$  time with hashing and randomization (algorithm S4). Triplet-based metric can be easily computed in  $O(\varsigma^3)$  time with simple preprocessing and iterating over all triplets. Both PD and MD take  $O(\varsigma^2)$  time with preprocessing that computes distances to MRCAs.

**Table S6.** Metrics for comparing the reference simulated tree  $R$  to estimated tree  $E$ .

| Metric                            | AB   | Definition                                                                                                                                                                                                      |
|-----------------------------------|------|-----------------------------------------------------------------------------------------------------------------------------------------------------------------------------------------------------------------|
| False discovery rate              | FDR  | $ \phi(E) \setminus \phi(R)  /  \phi(E) $                                                                                                                                                                       |
| FDR no singletons                 | FDR* | $ \phi(\mathbf{I}_E) \setminus \phi(\mathbf{I}_R)  /  \phi(\mathbf{I}_E) $                                                                                                                                      |
| False negative rate               | FNR  | $ \phi(R) \setminus \phi(E)  /  \phi(R) $                                                                                                                                                                       |
| FNR no singletons                 | FNR* | $ \phi(\mathbf{I}_R) \setminus \phi(\mathbf{I}_E)  /  \phi(\mathbf{I}_R) $                                                                                                                                      |
| RF cluster distance               | RF   | $ \phi(R) \cup \phi(E)  -  \phi(R) \cap \phi(E) $                                                                                                                                                               |
| RF cluster distance no singletons | RF*  | $ \phi(\mathbf{I}_R) \cup \phi(\mathbf{I}_E)  -  \phi(\mathbf{I}_R) \cap \phi(\mathbf{I}_E) $                                                                                                                   |
| Triplet discordance               | TD   | $ \{\Phi : \phi(R) \upharpoonright \Phi \neq \phi(E) \upharpoonright \Phi, \Phi \subset \{\Psi_1, \dots, \Psi_\varsigma\},  \Phi  = 3\} $                                                                       |
| Triplet edit distance             | TED  | $\sum_{\Phi \subset \{\Psi_1, \dots, \Psi_\varsigma\},  \Phi  = 3}  (\phi(R) \upharpoonright \Phi) \cup (\phi(E) \upharpoonright \Phi)  -  (\phi(R) \upharpoonright \Phi) \cap (\phi(E) \upharpoonright \Phi) $ |
| MRCA discordance                  | MD   | $\sum_{i,j \in [\varsigma]}  U_R(i,j) - U_E(i,j) $                                                                                                                                                              |
| Patristic distance                | PD   | $1/2 \sum_{i,j \in [\varsigma]}  U_R(i,j) + U_R(j,i) - U_E(i,j) - U_E(j,i) $                                                                                                                                    |

### 3 SUPPLEMENTARY FIGURES

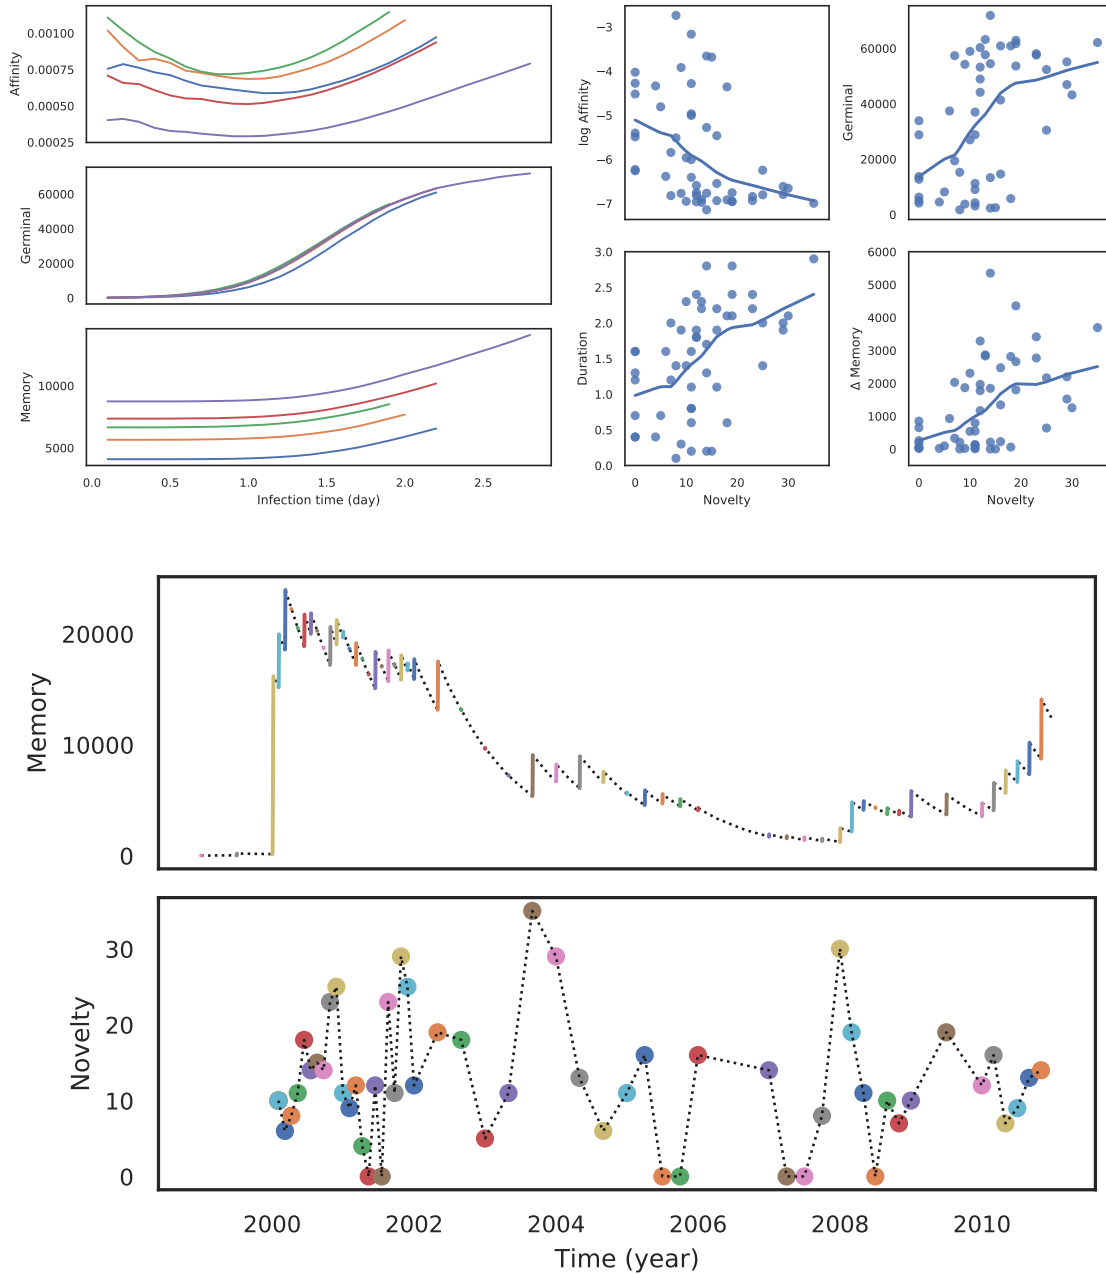

**Figure S1.** a) Log average affinity of activated cells to the current infection target at the end of the infection, the number of activated cells at the end of the infection, and the duration of infection by novelty of the target of one simulation under default conditions, showing the last five rounds as examples. b) Average affinity of activated cells to current infection target, the number of activated cells, and the number of memory cells by time after infection starts for the last five infections of one simulation under default conditions. Lines are fitted using the LOWESS (locally weighted scatter plot smoothing) algorithm. c) Number of memory cells and novelty of infections by time. Dormant stages are indicated by dotted lines.

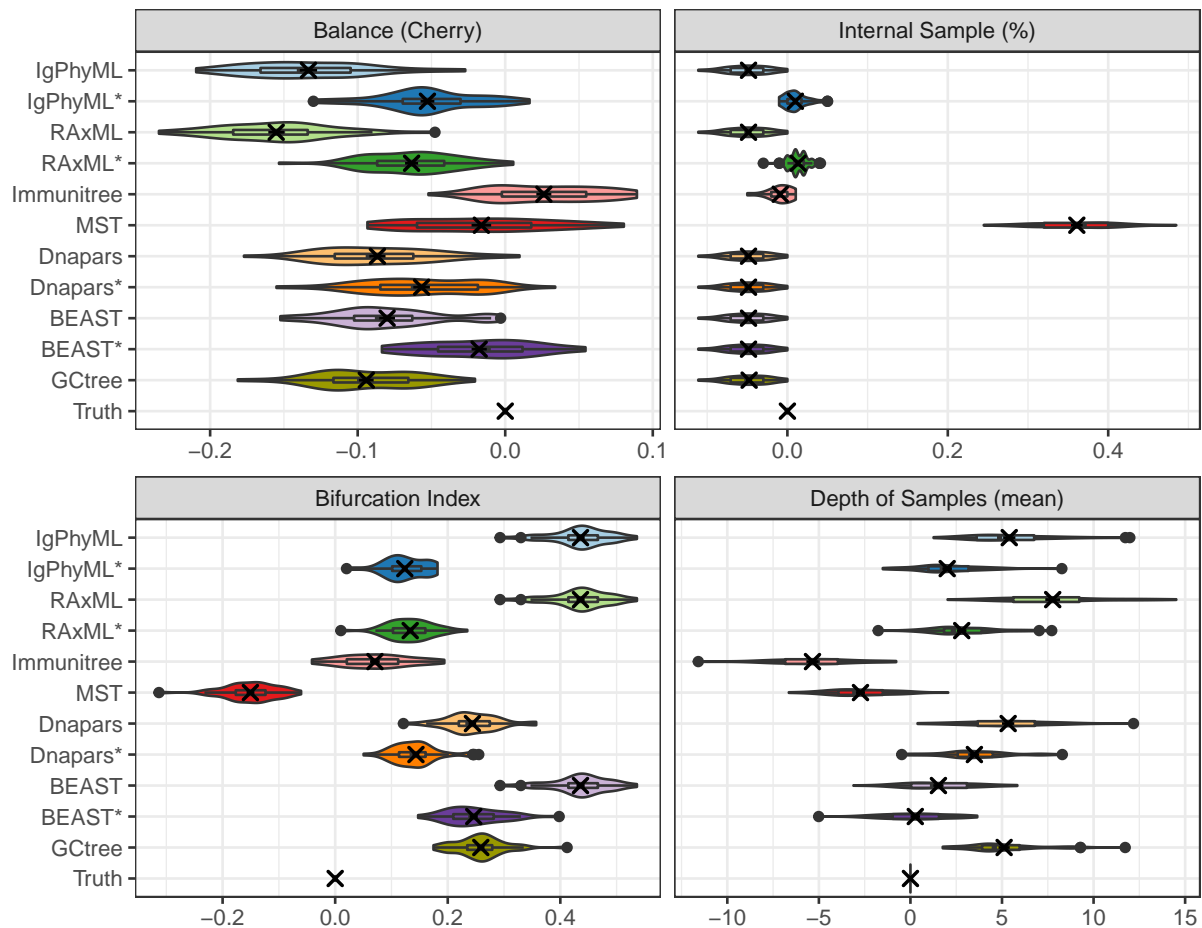

**Figure S2.** Property of the estimated tree in relative to the corresponding true tree (estimated minus tree) for default parameters of SARS-Cov2 dataset.

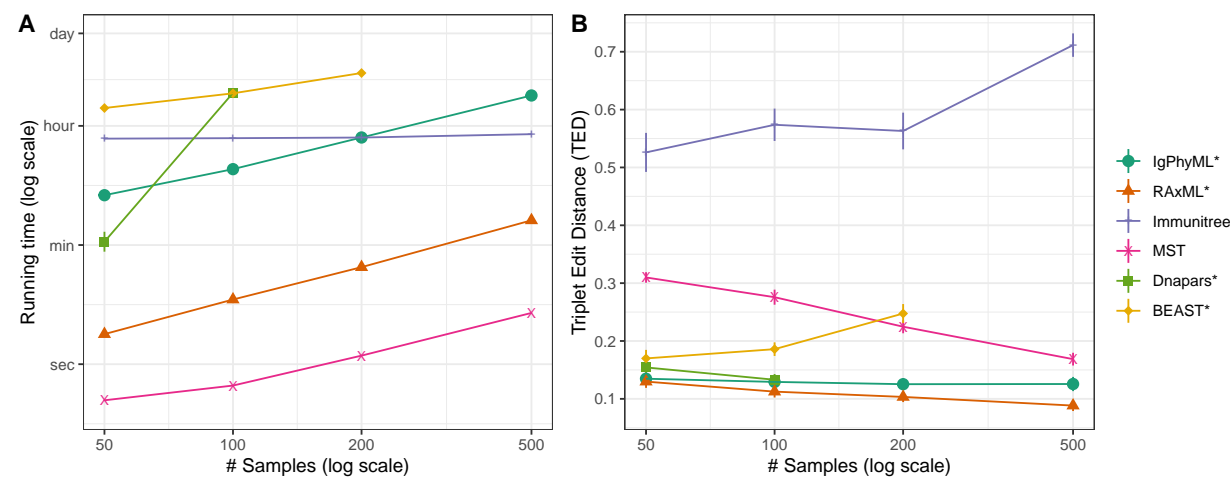

**Figure S3.** (A) Running time and (B) triplet edit distance (TED) of various reconstruction methods on SARS-CoV2 simulations under different sample sizes (50 replicates).

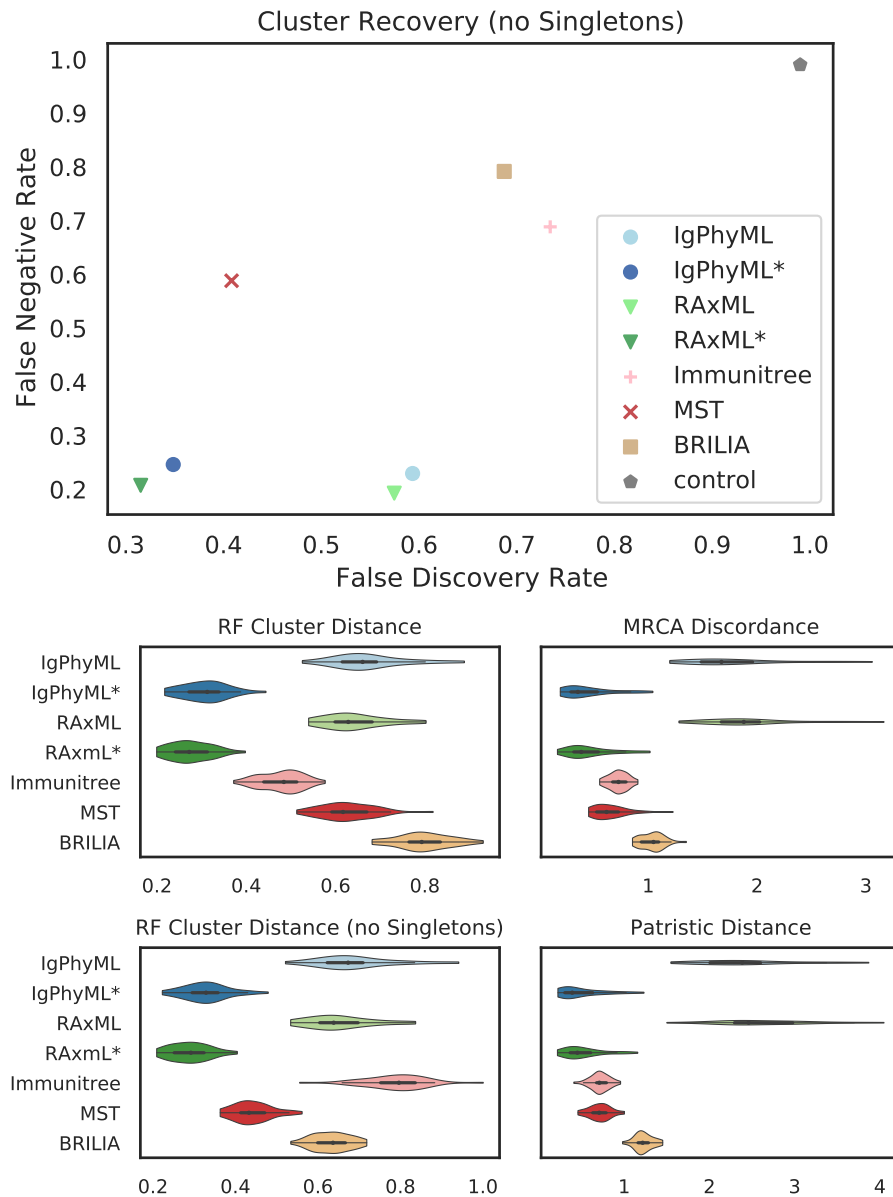

**Figure S4.** Top: FNR\* and FPR\* rates excluding singletons by reconstruction methods on simulations under default conditions; Bottom: Normalized Robinson-Foulds cluster distance with and without singletons (RF and RF \*), MD and PD.

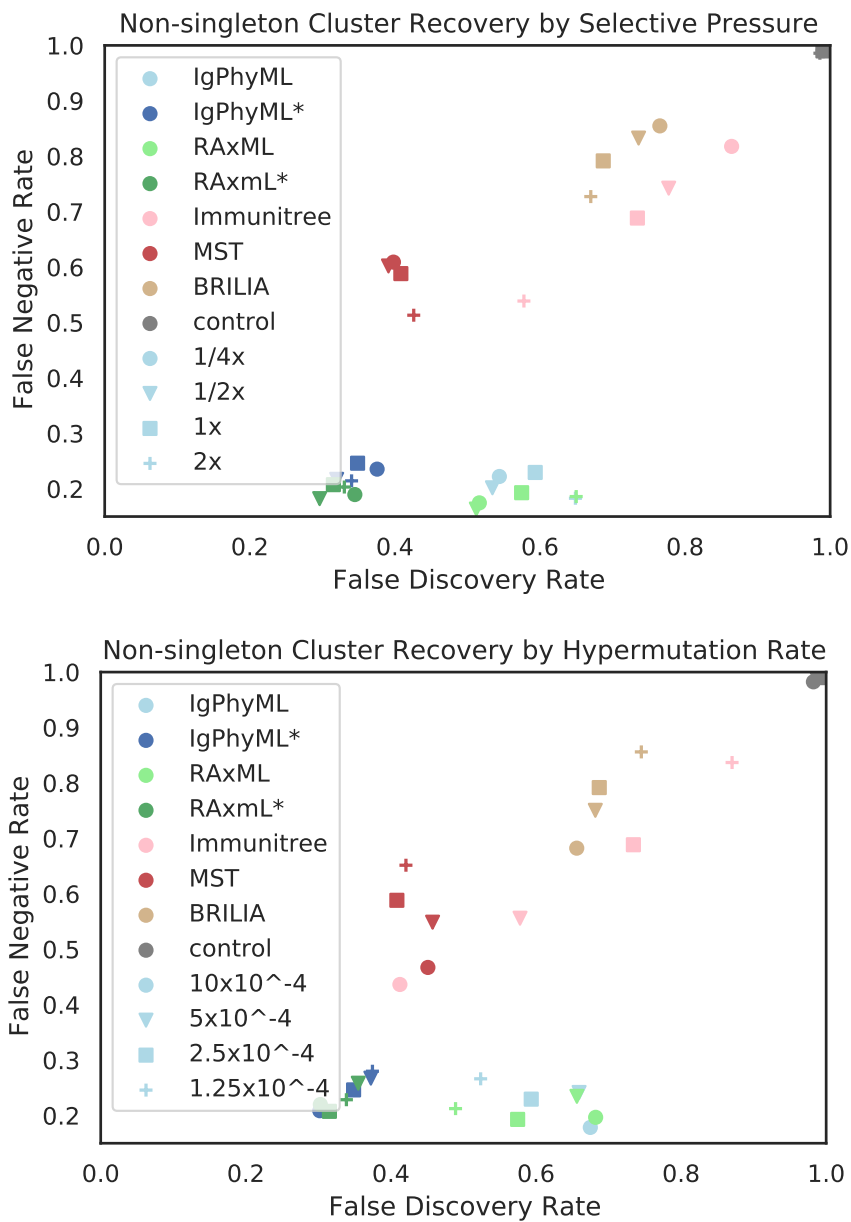



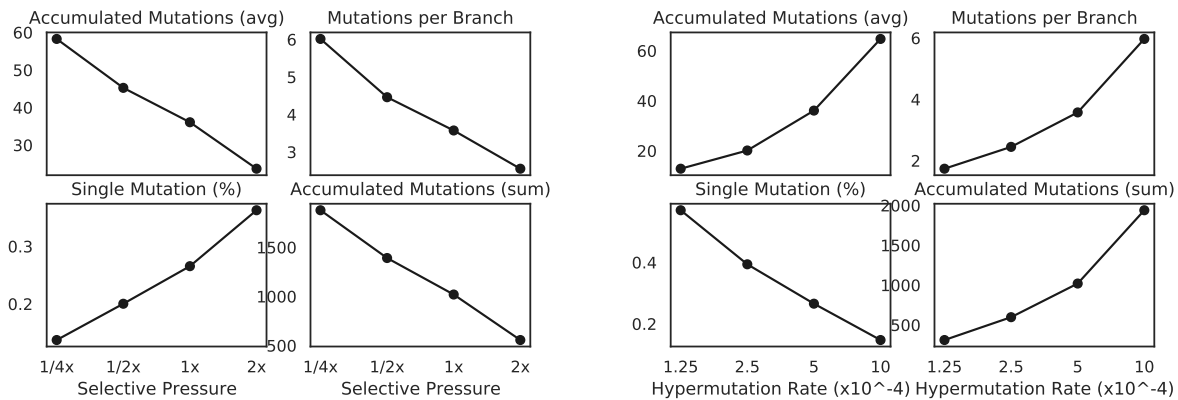

**Figure S6.** Impact of selective pressure  $A$  (left) and mutation rate  $\mu$  (right) on sequence-based branch length properties on true trees.  $\mu = 5 \times 10^{-4}$  in (a-d) and  $A = 0.1$  in (e-h).

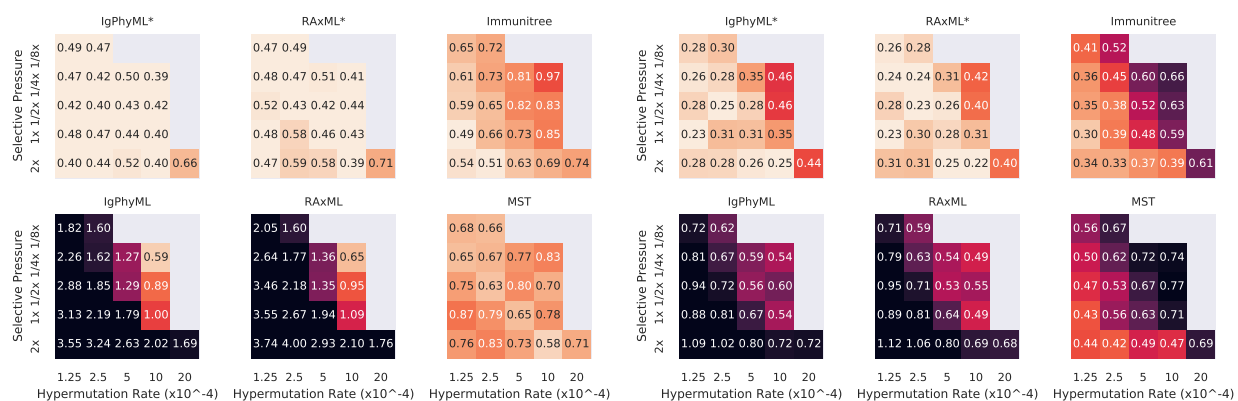

**Figure S7.** For varying levels of selective pressure ( $A$ ), rate of hypermutation ( $\mu$ ), and reconstruction methods, we show MD error (left), and RF error (right). Under some conditions, reconstructed trees from phylogenetic methods are worse than random permuting labels of true tree because both MD and RF (to a lesser degree) severely penalizes resolution of multifurcated nodes.

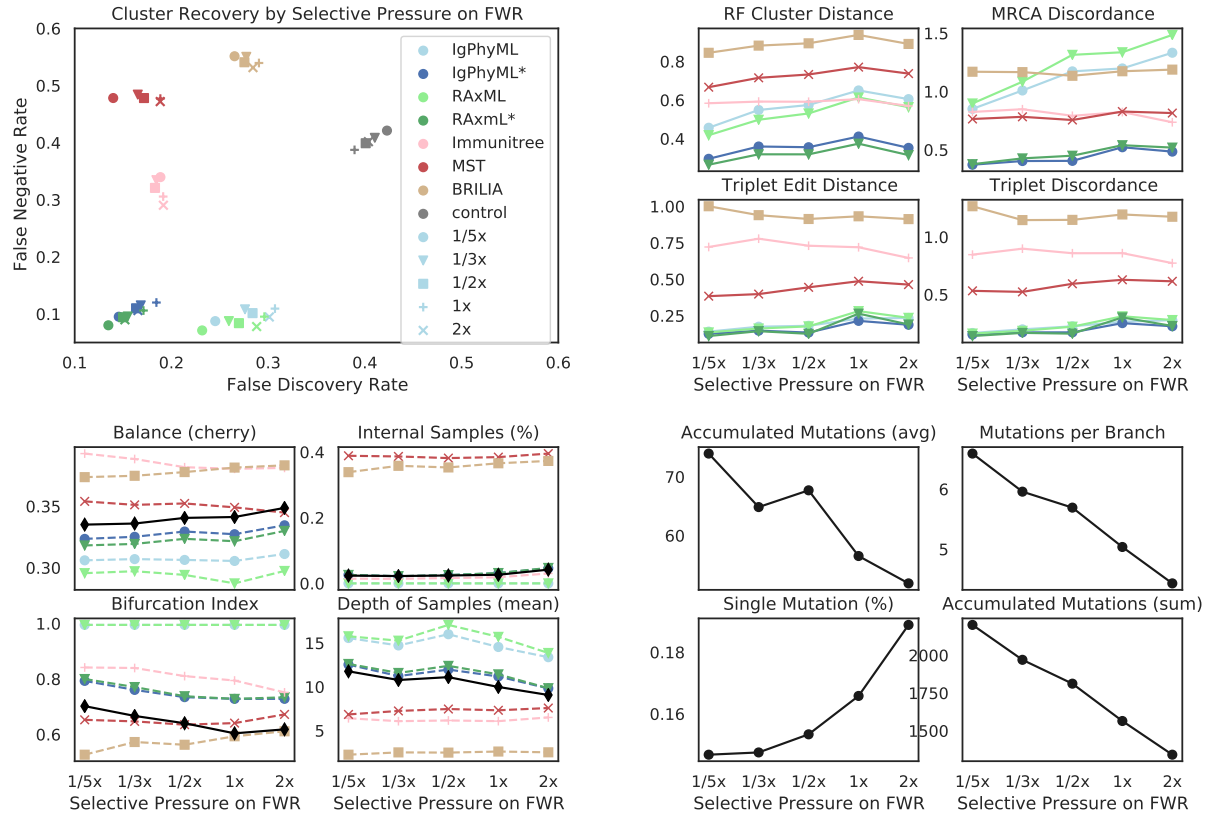

**Figure S8.** a) FNR versus FDR, b) Robinson-Foulds cluster distance (RF), MRCA Discordance (MD), triplet edit distance (TED), and triplet discordance (TD) by BLOSUM weight multiplier of framework region ( $w_f$ ) and reconstruction methods. c) Properties of true (black) and reconstructed trees by BLOSUM weight multiplier of framework region (FR). d) Properties of true trees.

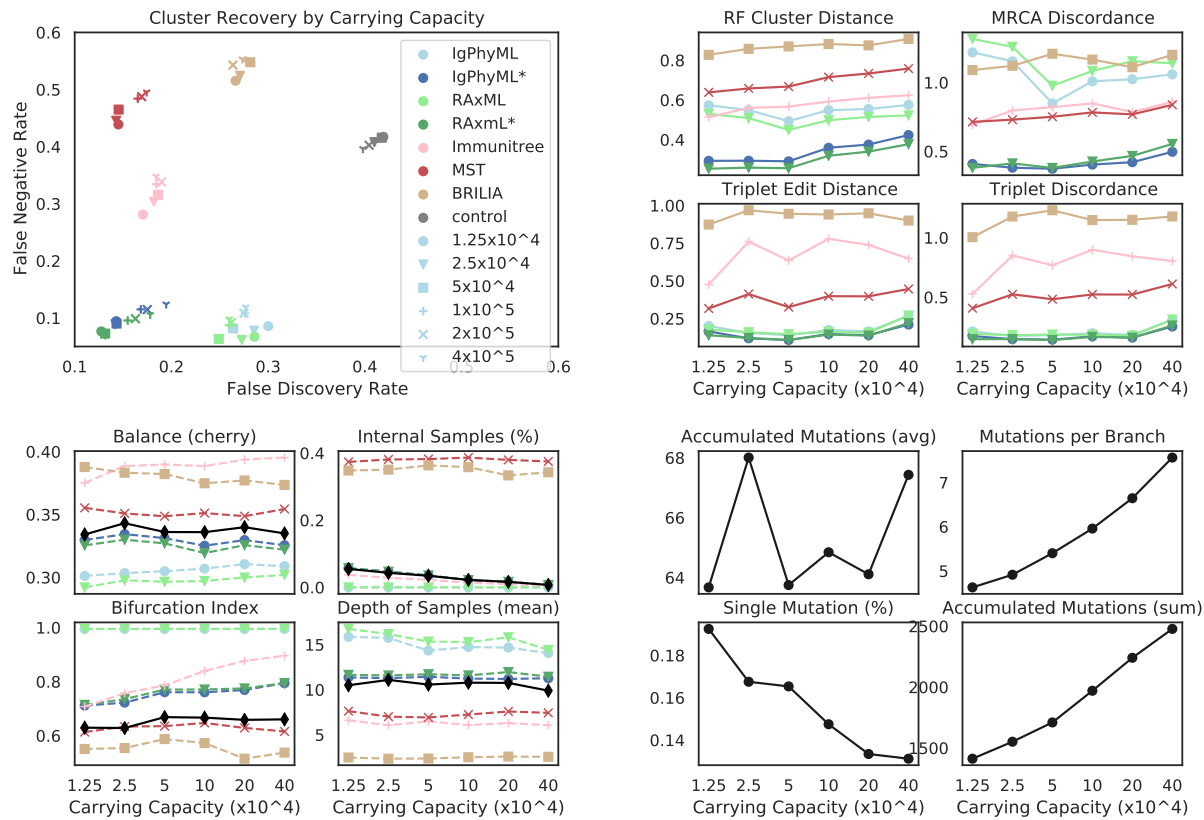

**Figure S9.** a) FNR versus FDR, b) Robinson-Foulds cluster distance (RF), MRCA Discordance (MD), triplet edit distance (TED), and triplet discordance (TD) by germinal center capacity ( $C$ ) and reconstruction methods. c) Properties of true (black) and reconstructed trees by carrying capacity of germinal center of FR. d) Properties of true trees.

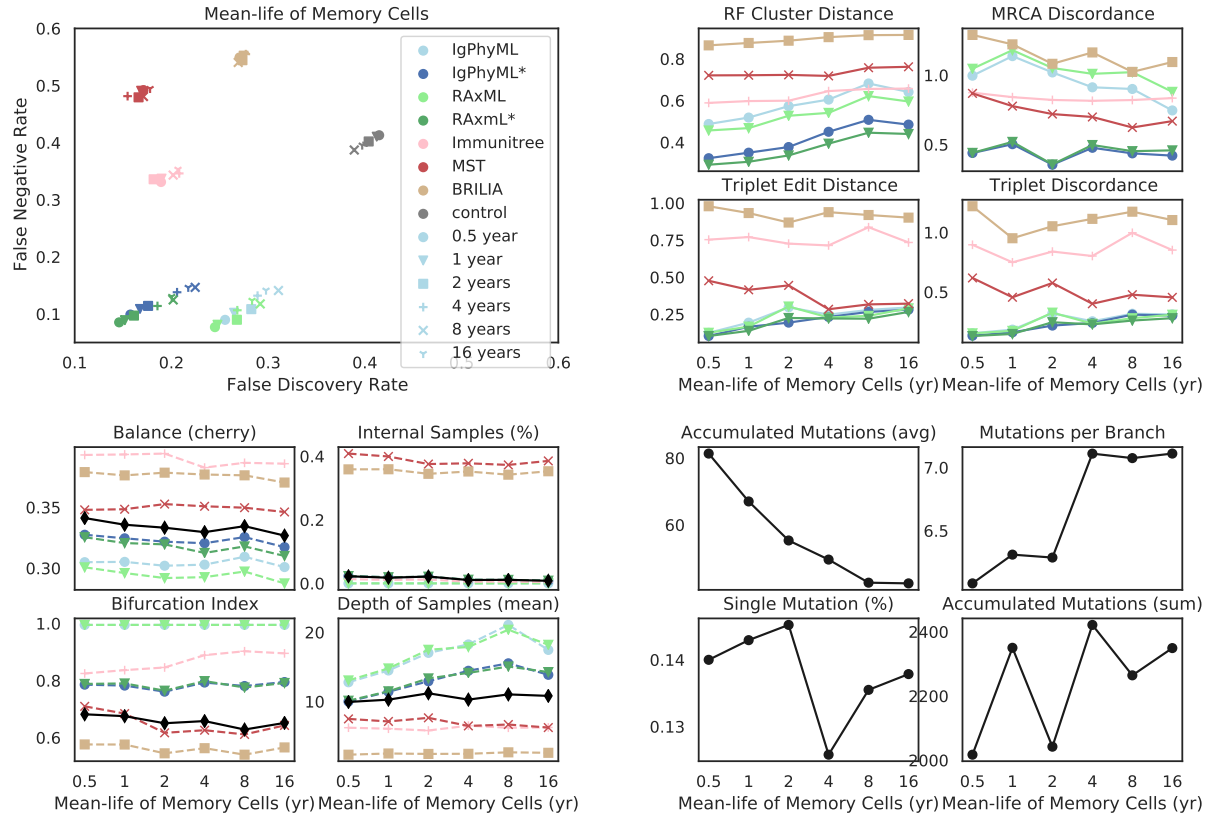

**Figure S10.** a) FNR versus FDR, b) Robinson-Foulds cluster distance (RF), MRCA Discordance (MD), triplet edit distance (TED), and triplet discordance (TD) by mean memory cell life-time ( $1/\lambda'_d$ ) and reconstruction methods. c) Properties of true (black) and reconstructed trees by memory cell life (mean). d) Properties of true trees.

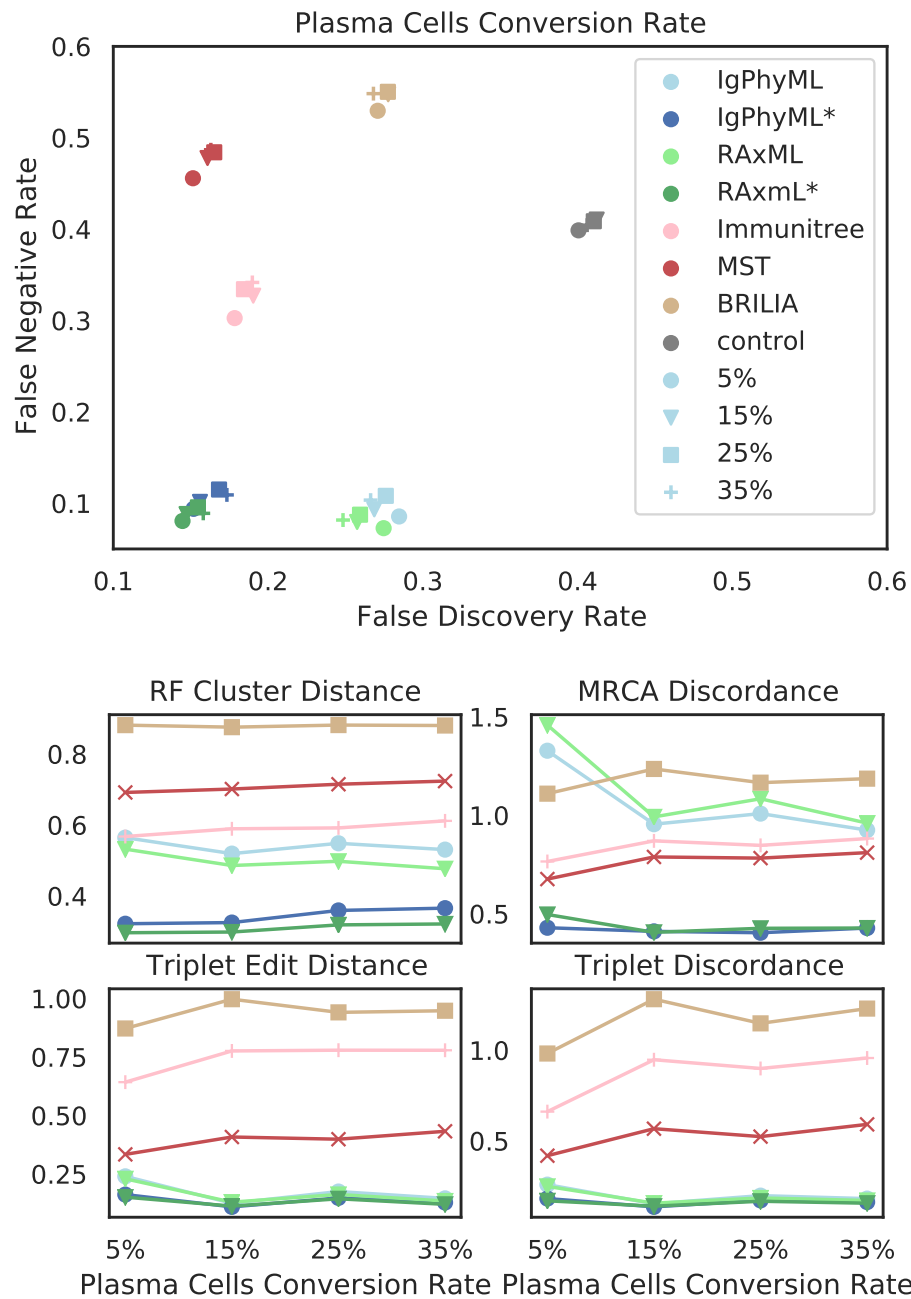

**Figure S11.** a) FNR versus FDR, b) Robinson-Foulds cluster distance (RF), MRCA Discordance (MD), triplet edit distance (TED), and triplet discordance (TD) by fraction of activated cells turning into plasma cell per cell division ( $\rho_p$ ).

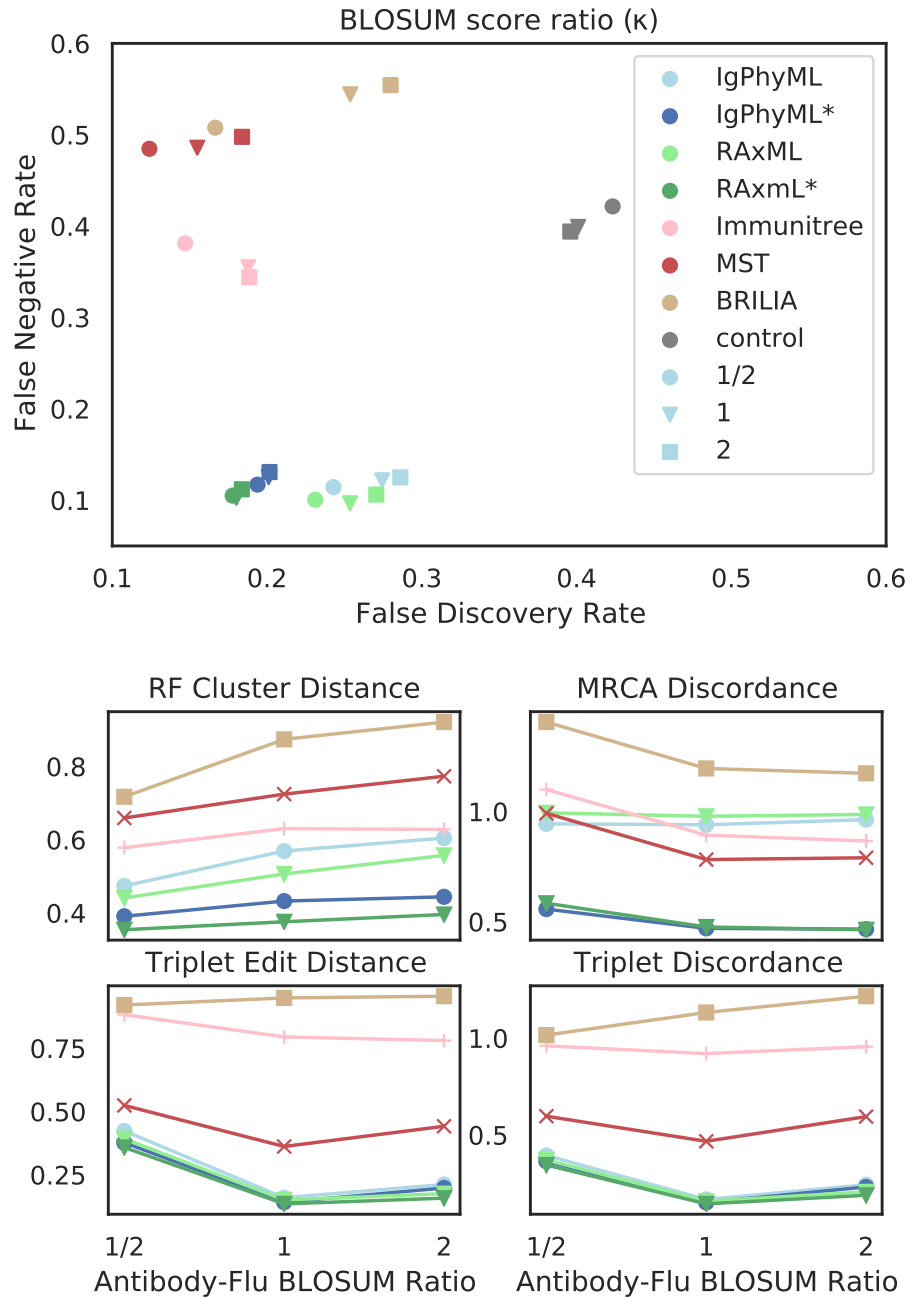

**Figure S12.** a) FNR versus FDR, b) Robinson-Foulds cluster distance (RF), MRCA Discordance (MD), triplet edit distance (TED), and triplet discordance (TD) by BLOSUM score ratio of antibody-coding sequences to antigen sequences ( $\kappa$ )

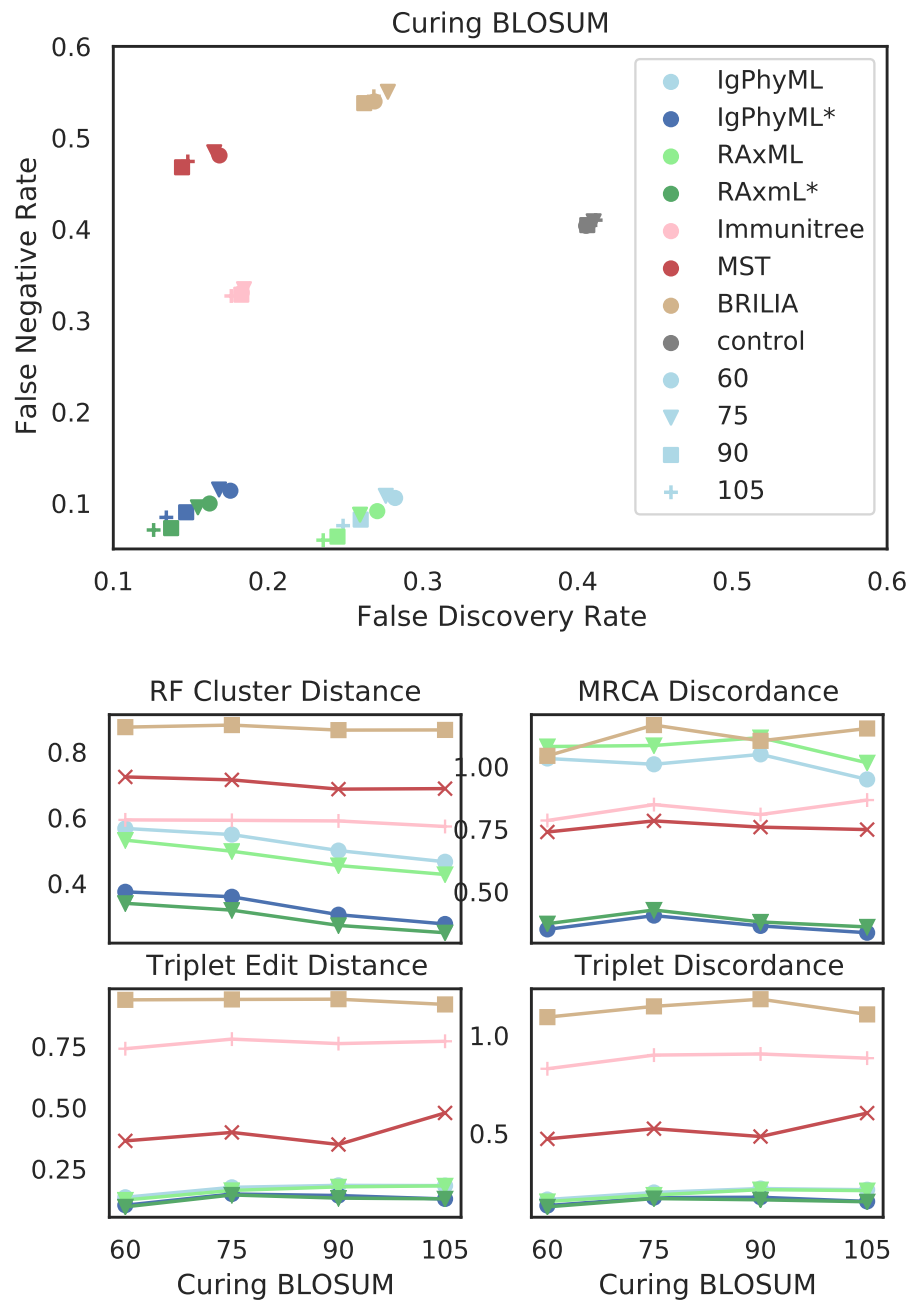

**Figure S13.** a) FNR versus FDR, b) Robinson-Foulds cluster distance (RF), MRCA Discordance (MD), triplet edit distance (TED), and triplet discordance (TD) by BLOSUM score of activated cell antibody-coding sequences that leads to cure ( $\Delta'_0$ ).

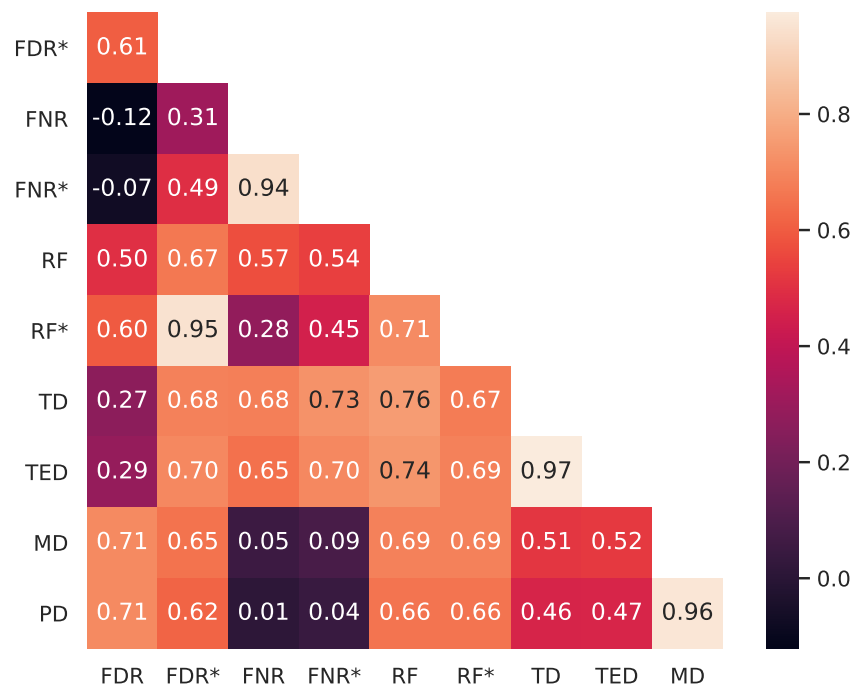

**Figure S14.** Correlations of evaluation metrics. For each replicate of each simulation condition, we compute Spearman’s rank correlation coefficient of the reconstruction method for each pair of evaluation metrics. Here, we show the average coefficient over all replicates of all simulation conditions.



## 4 SUPPLEMENTARY ALGORITHMS

**Algorithm S1** Simulating the next event and update time and  $S$  accordingly. Before running this procedure, we have computed  $\mathbf{S}$  and  $\theta_\alpha = \sum_{i \in S} \mathbf{x}_i^\alpha$  for all  $\alpha$  from the previous calls to this function (i.e., previous time steps). For each  $\alpha$ , we have also built an interval tree  $T_\alpha$  on leafset  $S$  and each node  $v$  storing the summation of  $\mathbf{x}_i^\alpha$  for each leaf  $i$  under  $v$ .

---

**procedure** SAMPLETREE( $\alpha, v$ )

**if**  $v$  is a leaf node **then**

**return**  $v$

**else**

$L \leftarrow$  the sum of  $\mathbf{x}_i^\alpha$  for each leaf  $i$  under left child of  $v$

$R \leftarrow$  the sum of  $\mathbf{x}_i^\alpha$  for each leaf  $i$  under right child of  $v$

$O \leftarrow$  the outcome of a flip of a biased coin with probability of being head  $\frac{L}{L+R}$

**if**  $O = \text{Head}$  **then**

**return** SAMPLETREE( $\alpha$ , the left child of  $v$ )

**else**

**return** SAMPLETREE( $\alpha$ , the right child of  $v$ )

**procedure** SIMULATINGONEEVENT

  time  $\leftarrow$  time + a random sample from exponential distribution where  $\lambda = \frac{\sum_{\alpha, \beta \in \Gamma} (P_{\alpha, \beta} \mathbf{S}^\beta \theta_\alpha)}{\sum_{\beta \in \Gamma} Q_\beta \mathbf{S}^\beta}$

$(\alpha, \beta) \leftarrow$  a random sample from distribution  $Pr(\alpha, \beta) = \frac{P_{\alpha, \beta} \mathbf{S}^\beta \theta_\alpha}{\sum_{\alpha, \beta \in \Gamma} (P_{\alpha, \beta} \mathbf{S}^\beta \theta_\alpha)}$

$i \leftarrow$  SAMPLETREE( $\alpha$ , the root of  $T_\alpha$ )

$E \leftarrow$  a sample from  $Pr(E = \text{Birth}) = \frac{B_{\alpha, \beta}}{P_{\alpha, \beta}}, Pr(E = \text{Death}) = \frac{D_{\alpha, \beta}}{P_{\alpha, \beta}}, Pr(E = \text{Transformation}) =$

$\frac{T_{\alpha, \beta}}{P_{\alpha, \beta}}$

**if**  $E = \text{Birth}$  **then**

$(j, k) \leftarrow$  a sample from distribution of outcomes of birth event of  $i$

$\mathbf{S} \leftarrow \mathbf{S} + \mathbf{x}_j + \mathbf{x}_k$

$S \leftarrow S \cup \{j, k\}$

**for**  $\alpha \in \Gamma$  **do**

$\theta_\alpha \leftarrow \theta_\alpha + \mathbf{x}_j^\alpha + \mathbf{x}_k^\alpha$

      add leaves  $j$  and  $k$  to  $T_\alpha$  while keeping the tree balanced using Algorithm S2

**if**  $E = \text{Transformation}$  **then**

$j \leftarrow$  a sample from distribution of outcomes of transformation event of  $i$

$\mathbf{S} \leftarrow \mathbf{S} + \mathbf{x}_j$

$S \leftarrow S \cup \{j\}$

**for**  $\alpha \in \Gamma$  **do**

$\theta_\alpha \leftarrow \theta_\alpha + \mathbf{x}_j^\alpha$

      add leaf  $j$  to  $T_\alpha$  while keeping the tree balanced using Algorithm S2

$\mathbf{S} \leftarrow \mathbf{S} - \mathbf{x}_i$

$S \leftarrow S - \{i\}$

**for**  $\alpha \in \Gamma$  **do**

$\theta_\alpha \leftarrow \theta_\alpha - \mathbf{x}_i^\alpha$

    remove leaf  $i$  from  $T_\alpha$ , making the leaf ready for future additions using Algorithm S2

---

**Algorithm S2** Exact algorithm for inserting or removing a leaf from tree  $T_\alpha$  keeping it balanced.  $T_\alpha$  is represented by a full binary tree where each leaf is labeled with either one entity or  $\emptyset$  and each node  $v$  has weight  $w_v$  equal to the sum of  $\mathbf{x}_i^\alpha$  for all leaves under  $v$  with label  $(i)$  not being  $\emptyset$ . Assuming a stack  $S_\alpha$  keeps all leaves with label  $\emptyset$ .

---

**procedure** ADDWEIGHT( $T_\alpha, i, v, u$ )

$w_u \leftarrow w_u + \mathbf{x}_i^\alpha$

**if**  $v$  is under left subtree of  $u$  **then**

ADDWEIGHT( $T_\alpha, i, v$ , the left child of  $u$ )

**if**  $v$  is under right subtree of  $u$  **then**

ADDWEIGHT( $T_\alpha, i, v$ , the right child of  $u$ )

**procedure** INSERTLEAF( $T_\alpha, i$ )

**if**  $S_\alpha$  is empty **then**

$H \leftarrow$  the height of  $T_\alpha$

$T' \leftarrow T_\alpha$

$T_\alpha \leftarrow$  a full binary tree of height  $H + 1$ , all leaves labeled  $\emptyset$ , and all nodes having weight 0

replace the left subtree of the root of  $T_\alpha$  with  $T'$

the weight the root of  $T_\alpha \leftarrow$  the weight of the left child of the root of  $T_\alpha$

push all leaves under right child of the root of  $T_\alpha$  into  $S_\alpha$

$v \leftarrow$  pop one element from  $S_\alpha$

label of  $v \leftarrow i$

ADDWEIGHT( $T_\alpha, i, v$ , the root of  $T_\alpha$ )

**procedure** REDUCEWEIGHT( $T_\alpha, i, v, u$ )

$w_u \leftarrow w_u + \mathbf{x}_i^\alpha$

**if**  $v$  is under left subtree of  $u$  **then**

REDUCEWEIGHT( $T_\alpha, i, v$ , the left child of  $u$ )

**if**  $v$  is under right subtree of  $u$  **then**

REDUCEWEIGHT( $T_\alpha, i, v$ , the right child of  $u$ )

**procedure** REMOVELEAF( $T_\alpha, i$ )

$v \leftarrow$  leaf of  $T_\alpha$  with label  $i$

label of  $v \leftarrow \emptyset$

push  $v$  onto  $S_\alpha$

REDUCEWEIGHT( $T_\alpha, i, v$ , the root of  $T_\alpha$ )

---

Recall:

$$\sum_{i,j \in [r]} \left| \kappa \sum_{p \in \text{CDR}} \delta(\zeta_i^{(p)}, \zeta_i^{(p)}) - \delta(\zeta_i^{(p)}, \zeta_j^{(p)}) - \sum_{q=1}^{L_\eta} (\delta(\eta_i^{(q)}, \eta_i^{(q)}) - \delta(\eta_i^{(q)}, \eta_j^{(q)})) \right|. \quad (\text{S4})$$

---

**Algorithm S3** Heuristics for choosing target sequences to minimize the objective function (S4).

---

```

for  $i \leftarrow 2$  to  $r$  do
  for  $q \in \text{CDR}$  do
     $C_i^{(q)} \leftarrow 0$ 
     $\zeta_i^{(q)} \leftarrow \zeta_1^{(q)}$ 
  for  $p \leftarrow 1$  to  $L_\eta$  do
     $t \leftarrow \text{Poisson}(\kappa)$ 
    for  $u \leftarrow 1$  to  $t$  do
       $q \leftarrow$  a uniform random element of CDR where  $\eta_1^{(p)} = \zeta_1^{(q)}$ 
      for  $i \leftarrow 2$  to  $r$  do
        if  $\eta_i^{(p)} \neq \eta_1^{(p)}$  then
           $C_i^{(q)} \leftarrow C_i^{(q)} + 1$ 
           $\zeta_i^{(q)} \leftarrow \eta_i^{(p)}$  with probability  $1/C_i^{(q)}$ 
   $b \leftarrow \text{True}$ 
  while  $b = \text{True}$  do
     $b \leftarrow \text{False}$ 
    for  $i \leftarrow 2$  to  $r$  do
      for  $q \in \text{CDR}$  do
        for  $s \in$  nucleotide alphabet do
          if replacing  $\zeta_i^{(q)}$  with  $s$  reduces the objective function then
             $b \leftarrow \text{True}$ 
             $\zeta_i^{(q)} \leftarrow s$ 

```

---



---

**Algorithm S4** The computeset algorithm

---

Let each label be uniformly randomly assigned to an element in a finite Abelian group with large enough order (e.g., 64-bit integers). To compute FNR, FDR, and RF, we just need to compute  $|\phi(R)| = |S_R|$ ,  $|\phi(E)| = |S_E|$ , and  $|\phi(R) \cap \phi(E)| = |S_R \cap S_E|$ , where set  $S_T$  for tree  $T$  can be computed by calling COMPUTESET( $T$ , the root of  $T$ ).

```

procedure COMPUTESET( $T, v$ )
   $w \leftarrow$  the element assigned to the label of  $v$ , if  $v$  has label; otherwise,  $w \leftarrow 0$ .
  for  $u$  in the children of  $v$  do
     $w \leftarrow w + \text{COMPUTESET}(T, u)$ 
  add element  $w$  to set  $S_T$ 
  return  $w$ 

```

---

## REFERENCES

Kurosawa Y, Tonegawa S. Organization, structure, and assembly of immunoglobulin heavy chain diversity DNA segments. *The Journal of Experimental Medicine* **155** (1982) 201–218.

- doi:10.1084/jem.155.1.201.
- Tonegawa S. Somatic generation of antibody diversity. *Nature* **302** (1983) 575–581. doi:10.1038/302575a0.
- Neuberger MS, Milstein C. Somatic hypermutation. *Current Opinion in Immunology* **7** (1995) 248–254. doi:10.1016/0952-7915(95)80010-7.
- Muramatsu M, Kinoshita K, Fagarasan S, Yamada S, Shinkai Y, Honjo T. Class Switch Recombination and Hypermutation Require Activation-Induced Cytidine Deaminase (AID), a Potential RNA Editing Enzyme. *Cell* **102** (2000) 553–563. doi:10.1016/S0092-8674(00)00078-7.
- Mesin L, Schiepers A, Ersching J, Barbulescu A, Cavazzoni CB, Angelini A, et al. Restricted clonality and limited germinal center reentry characterize memory b cell reactivation by boosting. *Cell* **180** (2020) 92–106.e11. doi:https://doi.org/10.1016/j.cell.2019.11.032.
- Hsiao YC, Shang Y, DiCara DM, Yee A, Lai J, Kim SH, et al. Immune repertoire mining for rapid affinity optimization of mouse monoclonal antibodies. *mAbs* **11** (2019) 735–746. doi:10.1080/19420862.2019.1584517.
- Safonova Y, Pevzner P. IgEvolution: clonal analysis of antibody repertoires. *BioRxiv* (2019) 1–18. doi:10.1101/725424.
- Peled JU, Kuang FL, Iglesias-Ussel MD, Roa S, Kalis SL, Goodman MF, et al. The biochemistry of somatic hypermutation. *Annu. Rev. Immunol.* **26** (2008) 481–511.
- Rogozin I, Kolchanov N. Somatic hypermutagenesis in immunoglobulin genes. ii. influence of neighbouring base sequences on mutagenesis. *Biochim Biophys Acta* **1171** (1992) 11–18.
- Rogozin IB, Diaz M. Cutting edge: DGYW/WRCH is a better predictor of mutability at G:C bases in Ig hypermutation than the widely accepted RGYW/WRCY motif and probably reflects a two-step activation-induced cytidine deaminase-triggered process. *J. Immunol.* **172** (2004) 3382–3384.
- Bransteitter R, Pham P, Calabrese P, Goodman MF. Biochemical analysis of hypermutational targeting by wild type and mutant activation-induced cytidine deaminase. *J. Biol. Chem.* **279** (2004) 51612–51621.
- Smith DS, Creadon G, Jena PK, Portanova JP, Kotzin BL, Wysocki LJ. Di- and trinucleotide target preferences of somatic mutagenesis in normal and autoreactive B cells. *J. Immunol.* **156** (1996) 2642–2652.
- Shapiro GS, Ellison MC, Wysocki LJ. Sequence-specific targeting of two bases on both DNA strands by the somatic hypermutation mechanism. *Mol. Immunol.* **40** (2003) 287–295.
- Yaari G, Vander Heiden JA, Uduman M, Gadala-Maria D, Gupta N, Joel JN, et al. Models of somatic hypermutation targeting and substitution based on synonymous mutations from high-throughput immunoglobulin sequencing data. *Frontiers in Immunology* **4** (2013). doi:10.3389/fimmu.2013.00358.
- Robinson D, Foulds L. Comparison of phylogenetic trees. *Mathematical Biosciences* **53** (1981) 131–147.
